# Supplementary material for: Overlapping Patterns of Rapid Evolution in the Nucleic Acid Sensors cGAS and OAS1 Suggest a Common Mechanism of Pathogen Antagonism and Escape
Source: PLoS Genet. 2015 May 5;11(5):e1005203. doi: 10.1371/journal.pgen.1005203 (PMC4420275; doi:10.1371/journal.pgen.1005203)
Supplement: S5 Table — (DOCX) [file pgen.1005203.s016.docx]

| **Table S5:** Likelihood ratio test statistics for PARRIS analysis of OAS1 gene. | | | | | |
| --- | --- | --- | --- | --- | --- |
|  | *ℓ* | 2δ | P-value | Parameter estimates | |
| Null Model (M1): no selection | -3536.87 |  |  |  |  |
| Alternative model (M2): selection | -3514.51 | 44.732 | <0.0001 | *ω*0= 0.15 | *(f*0= 0.639) |
|  |  |  | *ω*1= 1.00 | *(f*1= 0.000) |
|  |  |  | ***ω*2 = 3.22** | **(*f*2= 0.361)** |
